# Supplementary material for: Efficacy Of Chatgpt-4 in Oral Hygiene Counseling: Evaluation of Information Accuracy and Repeatability
Source: Research Square preprint supplement (doi:10.21203/rs.3.rs-6776535/v1), 2025-06-08
Supplement: Supplementary file 1 [file 0d795fd76745260107e77ff7.docx]

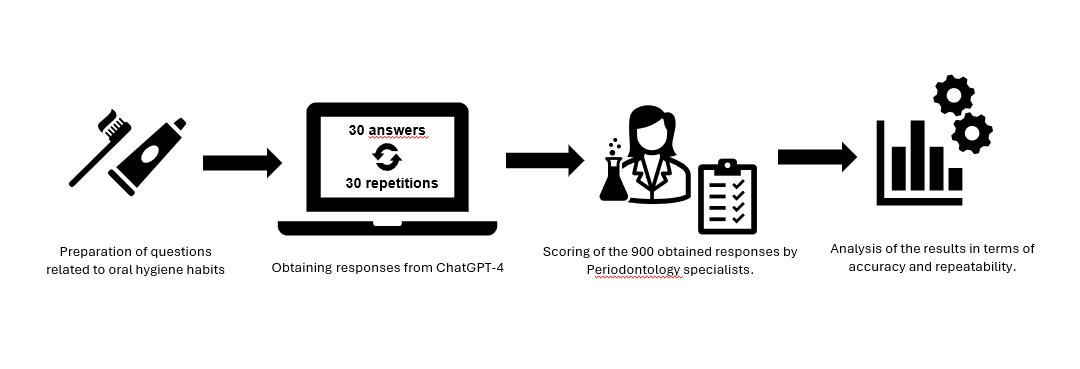


**Supplementary Figure 2**. Graphical workflow illustrating ChatGPT-4’s performance in answering questions related to oral hygiene habits.

The methodological approaches used in the study evaluating ChatGPT 4's performance as a virtual assistant in answering questions related to oral hygiene habits are presented sequentially (Supplementary Figure 2).
