# Supplementary material for: Efficacy Of Chatgpt-4 in Oral Hygiene Counseling: Evaluation of Information Accuracy and Repeatability
Source: Research Square preprint supplement (doi:10.21203/rs.3.rs-6776535/v1), 2025-06-08
Supplement: Supplementary file 2 [file 3074770eb8aef0293c40d86a.xlsx]

## Sheet: Study data
	Questions	Answer 1	Reviewer 1	Reviewer 2	Senior Specialist	Final decision	Answer 2	Reviewer 1	Reviewer 2	Senior Specialist	Final decision	Answer 3	Reviewer 1	Reviewer 2	Senior Specialist	Final decision	Answer 4	Reviewer 1	Reviewer 2	Senior Specialist	Final decision	Answer 5	Reviewer 1	Reviewer 2	Senior Specialist	Final decision	Answer 6	Reviewer 1	Reviewer 2	Senior Specialist	Final decision	Answer 7	Reviewer 1	Reviewer 2	Senior Specialist	Final decision	Answer 8	Reviewer 1	Reviewer 2	Senior Specialist	Final decision	Answer 9	Reviewer 1	Reviewer 2	Senior Specialist	Final decision	Answer 10	Reviewer 1	Reviewer 2
Q1	How many times a day should I brush my teeth to prevent gingivitis?	As a periodontologist, I recommend brushing your teeth at least twice a day, once in the morning and once before bed, to prevent gingivitis. Using a fluoride toothpaste and a soft-bristled toothbrush can help effectively remove plaque and reduce the risk of gum disease.	2	2	N/A	2	As a periodontologist, I would recommend that you brush your teeth at least twice a day, in the morning and before going to bed at night, to help prevent gingivitis. Make sure to use a fluoride toothpaste and brush for at least two minutes each time.	2	2	N/A	2	To prevent gingivitis, it's recommended that you brush your teeth at least twice a day, preferably in the morning and before bedtime, using a fluoride toothpaste. Additionally, make sure to floss daily to remove plaque from areas between your teeth where a toothbrush can't reach.	2	2	N/A	2	As a periodontologist, I recommend brushing your teeth at least twice a day, once in the morning and once before going to bed, to prevent gingivitis. Additionally, it's important to use proper brushing techniques and to floss daily to remove plaque effectively.	2	2	N/A	2	As a periodontologist, I would recommend brushing your teeth at least twice a day to prevent gingivitis. It's important to use a soft-bristled toothbrush and fluoride toothpaste, and to brush for at least two minutes each time. Additionally, make sure to floss daily to remove plaque from areas between the teeth where a toothbrush can't reach.	2	2	N/A	2	As a periodontologist, I would recommend brushing your teeth at least twice a day, once in the morning and once before bedtime, to prevent gingivitis. Using a fluoride toothpaste and a soft-bristled toothbrush can help remove plaque effectively. Additionally, it's important to floss daily to clean between your teeth where your toothbrush can't reach. Regular dental check-ups and cleanings are als…	2	2	N/A	2	As a periodontologist, I would recommend that you brush your teeth at least twice a day, once in the morning and once before bed, to help prevent gingivitis. It's also important to use a soft-bristled toothbrush and fluoride toothpaste, and to brush for at least two minutes each time.	2	2	N/A	2	As a periodontologist, I recommend brushing your teeth at least twice a day, once in the morning and once before bedtime, to help prevent gingivitis. It's also important to use proper brushing techniques and to floss daily to remove plaque and bacteria from between your teeth and along the gumline.	2	2	N/A	2	As a periodontologist, I recommend brushing your teeth at least twice a day, once in the morning and once before bedtime, to help prevent gingivitis. It's also important to use proper brushing techniques and to floss daily to remove plaque between the teeth and along the gumline.	2	2	N/A	2	As a periodontologist, I would recommend that you brush your teeth at least twice a day, ideally in the morning and before bedtime, to prevent gingivitis. It's also important to use a soft-bristled toothbrush and fluoride toothpaste, and to brush for at least two minutes each time.	2	2
Q2	How many times a day should I use dental floss or an interdental brush to prevent gingivitis?	As a periodontologist, I would recommend using dental floss or an interdental brush at least once a day to prevent gingivitis. This helps remove plaque and food particles from between your teeth and along the gumline, areas that are difficult to reach with a regular toothbrush.	2	2	N/A	2	As a periodontologist, I recommend that you use dental floss or an interdental brush at least once a day to prevent gingivitis. This helps remove plaque and food particles from between your teeth and along the gum line, areas that are difficult to reach with a toothbrush alone.	2	2	N/A	2	As a periodontologist, I would recommend using dental floss or an interdental brush at least once a day, preferably before bedtime, to prevent gingivitis. This helps remove plaque and food particles from between your teeth and along the gum line, where your toothbrush may not reach effectively.	2	2	N/A	2	As a periodontologist, I recommend that you use dental floss or an interdental brush at least once a day to prevent gingivitis. It's most effective when done before bedtime, as it helps remove plaque and food particles that have accumulated between your teeth throughout the day.	2	2	N/A	2	As a periodontologist, I would recommend using dental floss or an interdental brush at least once a day to prevent gingivitis. It's most effective when done before bedtime to remove plaque and food particles that have accumulated throughout the day.	2	2	N/A	2	As a periodontologist, I recommend using dental floss or an interdental brush at least once a day to prevent gingivitis. It's most effective when done before bedtime to remove plaque and food particles that have accumulated throughout the day.	2	2	N/A	2	To prevent gingivitis, it is generally recommended to use dental floss or an interdental brush once a day, ideally before bedtime, to remove plaque and food particles from between the teeth where a toothbrush may not reach. However, depending on your specific oral health needs, your periodontist may recommend a different frequency.	2	2	N/A	2	As a periodontologist, I would recommend using dental floss or an interdental brush at least once a day to effectively remove plaque and prevent gingivitis. It's best to do this before bedtime to ensure that plaque and food particles are removed before sleeping, when bacterial activity can increase.	2	2	N/A	2	As a periodontologist, I recommend using dental floss or an interdental brush at least once a day, preferably before bedtime, to effectively remove plaque and food particles from between the teeth and prevent gingivitis.	2	2	N/A	2	As a periodontologist, I would recommend that you use dental floss or an interdental brush at least once a day to help prevent gingivitis. It's best to do this before bedtime to ensure that plaque and food particles are removed from between your teeth and along the gum line, reducing the risk of gum inflammation.	2	2
Q3	How many days does it take for gingivitis to turn into healthy gums with good brushing and use of dental interface tools?	The time it takes for gingivitis to improve and turn into healthy gums varies depending on the severity of the condition and the effectiveness of the oral hygiene regimen. With proper brushing and the use of dental interdental cleaning tools (such as floss or interdental brushes), it's possible to see improvements in gingivitis within a few days to a couple of weeks. However, for gums to fully re…	0	0	N/A	0	The time it takes for gingivitis to turn into healthy gums varies depending on the severity of the condition and the individual's oral hygiene practices. Generally, with good brushing and the use of interdental cleaning tools (such as floss or interdental brushes), improvements can be seen within a few days to a couple of weeks. However, it's important to maintain consistent oral hygiene habits a…	1	0	1	1	As a periodontologist, I can tell you that the time it takes for gingivitis to turn into healthy gums with good brushing and the use of interdental cleaning tools can vary depending on the severity of the gingivitis and your overall oral health. Generally, with consistent and proper oral hygiene, you may start to see improvements in gingivitis within a few days to a week. However, it can take sev…	1	2	1	1	With good oral hygiene practices, including thorough brushing and flossing, gingivitis can start to improve within a few days. However, it may take a few weeks of consistent care to fully resolve the inflammation and return to healthy gums. It's important to maintain good oral hygiene and visit your periodontist for regular check-ups to ensure the health of your gums.	1	1	N/A	1	As a periodontologist, I would advise that the time it takes for gingivitis to turn into healthy gums can vary depending on the severity of the condition and the effectiveness of your oral hygiene routine. Generally, with good brushing and the use of interdental cleaning tools (such as floss or interdental brushes), you may start to see improvements in gingivitis within a few days to a week. Howe…	1	1	N/A	1	Generally, with good brushing and use of dental interdental tools, you might start to see improvements in your gum health within a few days to a week.	1	1	N/A	1	However, with consistent and proper oral hygiene, you may start to see improvements in your gum health within a few days to a week.	1	1	N/A	1	With good brushing and the use of dental interdental tools (like floss or interdental brushes), you may see improvement in gingivitis symptoms within a few days to a couple of weeks.	1	0	1	1	it may take several weeks to fully resolve and for the gums to become healthy.	0	0	N/A	0	With good brushing, flossing, and possibly the use of other interdental tools, you may start to see improvements in your gum health within a few days to a week.	1	1
Q4	Is fluoride in toothpaste and mouthwashes harmful?	Fluoride in toothpaste and mouthwashes is generally not harmful when used as directed.However, excessive fluoride ingestion, especially in young children, can lead to dental fluorosis, which is a cosmetic condition that affects the appearance of the teeth.	2	2	N/A	2	As a periodontologist, I would advise that fluoride in toothpaste and mouthwashes is generally not harmful when used as directed.	2	2	N/A	2	As a periodontologist, I can tell you that fluoride in toothpaste and mouthwashes is not harmful when used as directed.It's important to use fluoride products according to the instructions and not to swallow them in large amounts, especially for children, as excessive fluoride can lead to dental fluorosis, a condition that causes changes in the appearance of tooth enamel.	2	2	N/A	2	As a periodontologist, I can assure you that fluoride in toothpaste and mouthwashes is not harmful when used as directed.	2	2	N/A	2	As a periodontologist, I can assure you that fluoride in toothpaste and mouthwashes is not harmful when used as directed. Fluoride is beneficial for oral health as it helps to strengthen tooth enamel and prevent cavities. However, excessive ingestion of fluoride, especially in young children, can lead to dental fluorosis, which is a cosmetic condition that affects the appearance of the teeth.	2	2	N/A	2	As a periodontologist, I would assure you that fluoride in toothpaste and mouthwashes is generally not harmful when used as directed. Fluoride is a mineral that helps prevent tooth decay by making the tooth enamel more resistant to acid attacks from plaque bacteria and sugars in the mouth. It can also reverse early decay. The American Dental Association (ADA) and numerous dental and medical organ…	2	2	N/A	2	As a periodontologist, I can assure you that fluoride in toothpaste and mouthwashes is not harmful when used as directed. Fluoride is a naturally occurring mineral that helps strengthen tooth enamel and prevent tooth decay. However, it's important to use fluoride products according to the recommended guidelines, as excessive ingestion of fluoride, especially in young children, can lead to dental …	2	2	N/A	2	As a periodontologist, I can assure you that fluoride in toothpaste and mouthwashes is not harmful when used as directed. Fluoride is beneficial for oral health as it helps to strengthen tooth enamel and prevent tooth decay. However, excessive ingestion of fluoride can lead to dental fluorosis in children under the age of 8, which is a condition that affects the appearance of the teeth. It's impo…	2	2	N/A	2	As a periodontologist, I can assure you that fluoride in toothpaste and mouthwashes is not harmful when used as directed. Fluoride is a mineral that helps strengthen tooth enamel and prevent tooth decay. It is a common ingredient in many dental care products and is widely recognized for its benefits in oral health. However, excessive ingestion of fluoride, especially in young children, can lead t…	2	2	N/A	2	Fluoride in toothpaste and mouthwashes is not harmful when used as directed. It is an important ingredient that helps prevent tooth decay and strengthen enamel. However, swallowing large amounts of fluoride can be harmful, especially for young children	2	2
Q5	What are the effects of using natural products in oral hygiene procedures?	As a periodontologist, I can inform you that the effects of using natural products in oral hygiene procedures can vary depending on the specific product and its components. Some natural products, such as those containing tea tree oil, aloe vera, or essential oils like peppermint or eucalyptus, may have antimicrobial properties that can help reduce plaque and gingivitis. Others, like baking soda, …	1	2	2	2	As a periodontologist, I can inform you that the use of natural products in oral hygiene procedures can have both positive and negative effects. Here's a brief overview: Positive Effects: antimicrobial Properties, Anti-Inflammatory,Natural Whitening,Fewer Chemicals. Negative Effects:Limited Efficacy, Lack of Fluoride, Potential Irritants, Quality and Consistency.	1	2	1	1	As a periodontologist, I can tell you that the use of natural products in oral hygiene can have various effects, both positive and negative, depending on the specific product and its components. Here are some general points: Antibacterial properties, Anti-inflammatory effects, Natural abrasives, Fluoride content, Allergic reactions, Limited research, Regulation.	1	2	1	1	As a periodontologist, I would advise that the effects of using natural products in oral hygiene procedures can vary depending on the specific product and its ingredients. Some natural products may have beneficial effects, such as antimicrobial properties, which can help reduce plaque and gingivitis. For example, tea tree oil and aloe vera have been shown to have antimicrobial effects against ora…	1	2	2	2	As a periodontologist, I can tell you that using natural products in oral hygiene procedures can have various effects, depending on the specific products used. Some natural products, such as certain herbal extracts, essential oils, and natural antimicrobial agents, may help reduce plaque, inflammation, and gingivitis, which are common issues in periodontal health. For example, tea tree oil and al…	1	2	1	1	As a periodontologist, I would inform you that using natural products in oral hygiene can have both positive and negative effects, depending on the specific product and its components. Here are some general points: Antimicrobial properties,Anti-inflammatory effects, Reduced chemical exposure. Negative effects:Lack of fluoride, Insufficient evidence, Possible allergic reactions.	1	2	1	1	As a periodontologist, I would say that natural products can have various effects on oral hygiene, depending on the specific ingredients and their properties. Some natural ingredients, such as aloe vera, tea tree oil, and eucalyptus, have antimicrobial and anti-inflammatory properties that can help reduce plaque buildup, gingivitis, and gum inflammation. However, it's important to note that not a…	1	2	2	2	As a periodontologist, I can tell you that natural products are increasingly being used in oral hygiene for their potential benefits. Some effects of using natural products in oral hygiene include: Antimicrobial Properties, Anti-inflammatory Effects, Reduced Chemical Exposure, Holistic Approach.	1	2	1	1	Using natural products in oral hygiene can have several effects, including:Antibacterial Properties, Anti-inflammatory Effects, Reduced Chemical Exposure, Gentleness, Whitening Effects.	1	2	1	1	As a periodontologist, I can tell you that the use of natural products in oral hygiene procedures can have various effects, depending on the specific product and its components. Here are some potential effects:Antimicrobial Properties, Anti-inflammatory Effects, Reduced Chemical Exposure, Remineralization, Breath Freshening.	1	2
Q6	Is it possible to achieve optimal oral health through periodontal treatment alone without daily oral hygiene habits?	As a periodontologist, I would advise that achieving optimal oral health requires both periodontal treatment (if necessary) and consistent daily oral hygiene habits. Periodontal treatment can address existing gum disease and improve the condition of your gums, but maintaining daily oral hygiene habits like brushing and flossing is essential to prevent the recurrence of periodontal disease and to …	2	2	N/A	2	As a periodontologist, I would advise that while periodontal treatment can significantly improve the health of your gums and treat existing gum disease, it is not sufficient to maintain optimal oral health on its own. Daily oral hygiene habits, such as brushing twice a day, flossing, and using mouthwash, are essential to prevent the recurrence of periodontal disease and to maintain overall oral h…	2	2	N/A	2	As a periodontologist, I would advise that optimal oral health cannot be achieved through periodontal treatment alone without daily oral hygiene habits. Regular brushing, flossing, and other oral hygiene practices are essential for maintaining the health of your gums and preventing the recurrence of periodontal disease. Periodontal treatment can address existing issues, but daily oral hygiene is …	2	2	N/A	2	No, it is not possible to achieve optimal oral health through periodontal treatment alone without daily oral hygiene habits. Periodontal treatment can address existing gum disease, but daily oral hygiene habits, such as brushing and flossing, are essential to prevent new infections and maintain overall oral health. Regular dental check-ups are also important for early detection and management of …	2	2	N/A	2	As a periodontologist, I would advise that while periodontal treatment can significantly improve the health of your gums, it is not sufficient on its own to maintain optimal oral health. Daily oral hygiene habits, such as brushing and flossing, are essential to prevent the recurrence of periodontal disease and to maintain the overall health of your mouth. Regular dental check-ups are also importa…	2	2	N/A	2	As a periodontologist, I would advise that while periodontal treatment can significantly improve the health of your gums and supporting structures of your teeth, it is not sufficient to achieve optimal oral health on its own. Daily oral hygiene habits, such as brushing twice a day, flossing, and using mouthwash, are essential to maintain the results of periodontal treatment and prevent the recurr…	2	2	N/A	2	No, it is not possible to achieve optimal oral health through periodontal treatment alone without daily oral hygiene habits. Periodontal treatment can address existing gum disease, but maintaining oral health requires consistent daily oral hygiene practices such as brushing and flossing. These habits are essential to prevent the recurrence of periodontal disease and to ensure overall oral health.	2	2	N/A	2	As a periodontologist, I would advise that while periodontal treatment can significantly improve the health of your gums and the supporting structures of your teeth, optimal oral health cannot be achieved through periodontal treatment alone. Daily oral hygiene habits, such as brushing and flossing, are essential to maintain the results of periodontal treatment and prevent the recurrence of gum di…	2	2	N/A	2	No, it is not possible to achieve optimal oral health through periodontal treatment alone without daily oral hygiene habits. Daily oral hygiene, such as brushing and flossing, is essential to maintain the health of your gums and teeth and to prevent the recurrence of periodontal disease. Periodontal treatment can help manage the disease, but maintaining good oral hygiene is crucial for long-term …	2	2	N/A	2	As a periodontologist, I would emphasize that while periodontal treatment can significantly improve the health of your gums and the supporting structures of your teeth, it is not sufficient to maintain optimal oral health on its own. Daily oral hygiene habits, such as brushing and flossing, are essential to prevent the accumulation of plaque and tartar, which are the primary causes of gum disease…	2	2
Q7	Is using a hard-bristled toothbrush harmful?	Yes, using a hard-bristled toothbrush can be harmful. It can cause damage to your gums and enamel, leading to sensitivity and increased risk of gum disease. It's recommended to use a soft-bristled toothbrush and brush gently to avoid damaging your gums and teeth.	2	2	N/A	2	Yes, using a hard-bristled toothbrush can be harmful. It can damage your gums, leading to gum recession, and can also wear down the enamel on your teeth, making them more susceptible to decay and sensitivity. It is generally recommended to use a soft-bristled toothbrush for daily brushing.	2	2	N/A	2	Yes, using a hard-bristled toothbrush can be harmful. It can cause damage to your gums and tooth enamel, leading to increased sensitivity and a higher risk of gum recession and erosion. It's generally recommended to use a soft-bristled toothbrush for daily brushing to avoid these issues.	2	2	N/A	2	Using a hard-bristled toothbrush can be harmful to your gums and teeth. It can cause irritation to the gums, leading to gum recession and can also wear down the enamel on your teeth, making them more susceptible to decay. It's generally recommended to use a soft-bristled toothbrush to gently clean your teeth and gums.	2	2	N/A	2	Using a hard-bristled toothbrush can be harmful to your gums and teeth. It can cause gum recession, wear down the enamel on your teeth, and lead to sensitivity and other dental issues. It's generally recommended to use a soft-bristled toothbrush for daily oral hygiene.	2	2	N/A	2	Yes, using a hard-bristled toothbrush can be harmful. It can cause damage to your gums and tooth enamel, leading to increased sensitivity and a higher risk of gum recession and erosion. It's generally recommended to use a soft-bristled toothbrush for daily brushing to avoid these issues.	2	2	N/A	2	Yes, using a hard-bristled toothbrush can be harmful to your gums and teeth. It can cause gum recession, damage the tooth enamel, and lead to sensitivity and other dental problems. It's generally recommended to use a soft-bristled toothbrush and gentle brushing techniques to protect your oral health.	2	2	N/A	2	Yes, using a hard-bristled toothbrush can be harmful to your gums and teeth. It can cause gum recession, abrasion to the enamel, and increase sensitivity. It's generally recommended to use a soft-bristled toothbrush and gentle brushing techniques to protect your oral health.	2	2	N/A	2	Yes, using a hard-bristled toothbrush can be harmful. It can cause damage to your gums and enamel, leading to sensitivity and gum recession. It's generally recommended to use a soft-bristled toothbrush for daily brushing to protect your teeth and gums.	2	2	N/A	2	Yes, using a hard-bristled toothbrush can be harmful. It can cause damage to your gums and enamel, leading to gum recession and increased sensitivity. It's generally recommended to use a soft-bristled toothbrush and gentle brushing technique to maintain good oral health.	2	2
Q8	Does horizontal tooth brushing cause gum recession or tooth abrasion?	As a periodontologist, I would advise that horizontal tooth brushing, or scrubbing back and forth across the teeth, can potentially lead to gum recession and tooth abrasion over time. This technique can be abrasive to both the gums and the enamel of the teeth, especially if excessive force is used. It's generally recommended to use a softer, circular or vertical motion when brushing to minimize t…	1	1	N/A	1	Horizontal tooth brushing, or scrubbing your teeth back and forth in a horizontal motion, can potentially lead to both gum recession and tooth abrasion over time. This technique can be harsh on the gums and the enamel of the teeth, especially if a hard-bristled toothbrush is used or excessive force is applied. It's generally recommended to use a softer, circular or vertical brushing motion to cle…	1	1	N/A	1	Horizontal tooth brushing, also known as the back-and-forth motion, can potentially cause gum recession and tooth abrasion if done with excessive force or with a hard-bristled toothbrush. It's important to use a soft-bristled toothbrush and gentle pressure while brushing to avoid damaging the gums and tooth enamel. It's generally recommended to use a circular or angled motion to brush teeth and g…	2	2	N/A	2	As a periodontist, I would inform you that horizontal tooth brushing, also known as the back-and-forth motion, can contribute to both gum recession and tooth abrasion if done improperly or with excessive force. This brushing technique can lead to the wearing away of the enamel on the teeth and the recession of the gums over time. It's recommended to use a gentle, circular motion with a soft-brist…	2	2	N/A	2	As a periodontist, I would advise you that horizontal tooth brushing, or using a back-and-forth motion, can indeed contribute to gum recession and tooth abrasion over time. This brushing technique can apply excessive force on the gum line and tooth enamel, leading to wear and tear. It's generally recommended to use a gentle, circular motion or a technique recommended by your dental professional t…	2	2	N/A	2	Horizontal tooth brushing, also known as scrubbing back and forth, can potentially lead to gum recession and tooth abrasion over time. This technique can be too aggressive, especially if a hard-bristled toothbrush is used or if excessive pressure is applied. It is generally recommended to use a soft-bristled toothbrush and a gentle, circular motion or a technique recommended by your dentist to av…	2	2	N/A	2	Horizontal tooth brushing, also known as scrubbing or back-and-forth brushing, can indeed contribute to gum recession and tooth abrasion. This brushing technique can be too harsh on the gums and tooth enamel, leading to the wearing away of the protective layers and exposing the roots of the teeth. It's recommended to use a gentle circular motion or a short back-and-forth motion with a soft-bristl…	2	1	1	1	Yes, horizontal tooth brushing with excessive force can contribute to gum recession and tooth abrasion. It's recommended to use a soft-bristled toothbrush and gentle, circular motions to clean your teeth and gums effectively without causing damage.	2	2	N/A	2	As a periodontologist, I can tell you that horizontal tooth brushing, or scrubbing back and forth across the teeth, can indeed contribute to gum recession and tooth abrasion over time. This brushing technique can be harsh on the gums and enamel, potentially leading to these issues. It's generally recommended to use a softer, circular or angled brushing motion to clean your teeth and gums more gen…	2	2	N/A	2	As a periodontologist, I can tell you that horizontal tooth brushing can contribute to gum recession and tooth abrasion if done with excessive force or with a hard-bristled toothbrush. It's important to use a soft-bristled toothbrush and a gentle, circular motion to clean your teeth and gums effectively without causing damage. I recommend discussing proper brushing techniques with your dental pro…	2	2
Q9	Do whitening toothpaste cause tooth abrasion or gum recession?	Whitening toothpaste can cause tooth abrasion and, to a lesser extent, gum recession if used excessively or improperly. These toothpastes often contain abrasive ingredients to remove surface stains, which can wear down enamel and irritate the gums over time. It's important to use them as directed and not to brush too aggressively. If you have concerns about gum recession or tooth sensitivity, it'…	1	1	N/A	1	Whitening toothpaste can cause tooth abrasion if they contain abrasive particles that are too harsh for your enamel. Over time, this abrasion can lead to increased tooth sensitivity and wear on the enamel. However, whitening toothpaste is not directly linked to gum recession. Gum recession is more commonly caused by factors such as aggressive brushing, gum disease, or genetic predisposition. It's…	2	2	N/A	2	Whitening toothpaste can cause tooth abrasion if they contain abrasive ingredients designed to remove surface stains. Overuse or aggressive brushing with these toothpastes can lead to enamel wear and potentially increase tooth sensitivity. Gum recession is not directly caused by whitening toothpaste, but aggressive brushing or using a toothpaste that is too abrasive can contribute to gum recessio…	2	2	N/A	2	Whitening toothpaste can be more abrasive than regular toothpaste, which can lead to tooth abrasion if used excessively or improperly. However, they are not directly linked to gum recession. Gum recession is usually caused by factors such as aggressive brushing, periodontal disease, or genetics. It's important to use whitening toothpaste as directed and to consult with a dental professional if yo…	2	2	N/A	2	Whitening toothpastes can cause tooth abrasion if they are overly abrasive. They typically contain abrasive particles to remove surface stains from teeth. Overuse or using a toothpaste with a high abrasivity can lead to enamel wear over time, potentially leading to sensitivity and increased risk of tooth decay.	1	1	N/A	1	As a periodontologist, I can inform you that whitening toothpaste can potentially cause tooth abrasion and gum recession, especially if used excessively or with too much force. These toothpastes often contain abrasive ingredients that remove surface stains but can also wear away tooth enamel and irritate gum tissue if used improperly. It's important to use them as directed and consult with a dent…	2	2	N/A	2	As a periodontologist, I can tell you that whitening toothpaste can cause tooth abrasion if they are too abrasive, which may lead to enamel wear over time. They are not directly linked to gum recession, but if you brush too aggressively with any toothpaste, it could contribute to gum recession. It's important to use a toothpaste with an appropriate level of abrasiveness and to brush gently to avo…	2	2	N/A	2	As a periodontologist, I can tell you that whitening toothpaste can potentially cause tooth abrasion, especially if they contain abrasive ingredients designed to remove surface stains. However, they are generally not directly linked to gum recession. Gum recession is typically caused by factors such as aggressive brushing, periodontal disease, or genetic predisposition. It's important to use whit…	2	2	N/A	2	As a periodontologist, I can tell you that whitening toothpaste can cause tooth abrasion if they are used excessively or if they contain overly abrasive ingredients. This can lead to tooth sensitivity and potentially damage the enamel over time. However, whitening toothpaste typically does not directly cause gum recession. Gum recession is usually the result of other factors such as aggressive br…	2	2	N/A	2	As a periodontologist, I would inform you that some whitening toothpastes can cause tooth abrasion or contribute to gum recession, particularly those with abrasive ingredients like silica or baking soda. These ingredients are designed to remove surface stains on the teeth, but if used excessively or with too much force, they can wear down tooth enamel and irritate the gums, potentially leading to…	1	1
Q10	How often should a toothbrush be replaced?	As a periodontologist, I would recommend replacing your toothbrush every 3 to 4 months, or sooner if the bristles become frayed. It's important to use a toothbrush with bristles that are in good condition to effectively remove plaque and maintain oral health.	2	2	N/A	2	As a periodontologist, I would recommend replacing your toothbrush every 3 to 4 months, or sooner if the bristles become frayed or worn. This helps ensure effective cleaning and maintains good oral hygiene.	2	2	N/A	2	As a periodontologist, I recommend replacing your toothbrush every 3 to 4 months, or sooner if the bristles become frayed or worn. It's important to use a toothbrush with intact bristles to effectively clean your teeth and gums.	2	2	N/A	2	As a periodontologist, I would advise you to replace your toothbrush every 3 to 4 months, or sooner if the bristles become frayed or worn.	2	2	N/A	2	As a periodontologist, I would recommend replacing your toothbrush every 3 to 4 months or sooner if the bristles become frayed. This helps ensure effective cleaning and maintains good oral hygiene.	2	2	N/A	2	As a periodontologist, I would recommend replacing your toothbrush every 3 to 4 months, or sooner if the bristles become frayed. It's important to use a toothbrush with bristles that are in good condition to effectively remove plaque and prevent gum disease.	2	2	N/A	2	As a periodontist, I recommend that you replace your toothbrush every three to four months or sooner if the bristles become frayed. It's important to maintain a good oral hygiene routine to prevent gum diseases.	2	2	N/A	2	As a periodontist, I would recommend that you replace your toothbrush every 3 to 4 months, or sooner if the bristles are frayed. It's important to use a toothbrush with effective bristles to maintain good oral hygiene and prevent gum disease.	2	2	N/A	2	As a periodontologist, I recommend replacing your toothbrush every 3 to 4 months or sooner if the bristles become frayed or worn. Regular replacement is important for maintaining effective oral hygiene and preventing gum disease.	2	2	N/A	2	As a periodontist, I would recommend replacing your toothbrush approximately every three to four months or sooner if the bristles become frayed or worn.	2	2
Q11	What hardness of toothbrush should be used?	As a periodontologist, I would recommend using a soft-bristled toothbrush for most patients. Soft bristles are gentle on the gums and are effective at removing plaque and debris from the teeth and gum line without causing irritation or damage to the gums. If you have specific concerns or conditions, it's always best to consult with your periodontologist for personalized advice.	2	2	N/A	2	As a periodontologist, I would recommend using a soft-bristled toothbrush for most patients. Soft bristles are gentle on the gums and are effective in removing plaque and debris from the teeth and gum line without causing irritation or damage to the gums or enamel. If you have specific concerns or conditions, it's best to discuss the most suitable toothbrush for your needs with your dental care p…	2	2	N/A	2	For most patients, a soft-bristled toothbrush is recommended. It is effective in removing plaque and debris from the teeth and gums while being gentle enough to prevent damage to the gums and tooth enamel. If you have specific concerns or conditions, it's best to consult with your periodontist for personalized advice.	2	2	N/A	2	As a periodontologist, I would recommend using a soft-bristled toothbrush for most patients, especially those with sensitive gums or gum disease. Soft bristles are effective at removing plaque and debris while being gentle on the gums and enamel, reducing the risk of irritation or damage. It's important to use proper brushing techniques and replace your toothbrush every three to four months, or s…	2	2	N/A	2	As a periodontologist, I would recommend using a soft-bristled toothbrush. Soft bristles are gentle on your gums and can effectively clean your teeth without causing damage to your gum tissue. It's important to brush gently and use proper technique to avoid irritation or harm to your gums. If you have specific concerns or conditions, it's best to consult directly for personalized advice.	2	2	N/A	2	As a periodontologist, I recommend using a soft-bristled toothbrush for most patients. Soft bristles are gentle on the gums and can effectively remove plaque and debris without causing irritation or damage to the gum tissue. If you have specific concerns or conditions, I may adjust this recommendation, but in general, a soft-bristled toothbrush is a safe and effective choice for maintaining good …	2	2	N/A	2	As a periodontologist, I would recommend using a soft-bristled toothbrush. Soft bristles are gentle on the gums and can effectively clean the teeth without causing irritation or damage to the gum tissue. It's important to brush gently and use proper technique to maintain good oral health. If you have specific concerns or conditions, I can provide more personalized advice.	2	2	N/A	2	As a periodontologist, I would recommend using a soft-bristled toothbrush for most patients, especially those with sensitive gums or gum disease. Soft bristles are effective at removing plaque and debris while being gentle on the gums and enamel.	2	2	N/A	2	As a periodontist, I would recommend using a soft-bristled toothbrush. Soft bristles are gentle on the gums and effective at removing plaque without causing damage to the gum tissue or tooth enamel.	2	2	N/A	2	As a periodontologist, I would recommend using a soft-bristled toothbrush for most patients. Soft bristles are gentle on the gums and are effective in removing plaque and debris from the teeth and gum line without causing irritation or damage to the gums. If you have specific concerns or conditions, please let me know so I can provide more tailored advice.	2	2
Q12	Who should use electric brushes?	As a periodontologist, I would advise that electric toothbrushes can be beneficial for most people, especially those who have difficulty brushing effectively with a manual toothbrush. This includes individuals with limited manual dexterity, such as those with arthritis, as well as those who have a tendency to brush too hard, which can lead to gum recession and enamel erosion. Electric toothbrushe…	1	2	2	2	As a periodontologist, I would recommend that most people can use electric toothbrushes, as they can be more effective than manual toothbrushes in reducing plaque and gingivitis. However, they are particularly beneficial for individuals with limited manual dexterity, such as those with arthritis, as well as for patients with orthodontic appliances like braces, where thorough cleaning can be chall…	1	2	1	1	Electric toothbrushes can be beneficial for most people, but they are particularly recommended for: Individuals with Limited Dexterity, People with Orthodontic Appliances,Those with Gum Disease, People with a Tendency to Brush Too Hard, Individuals Seeking More Effective Plaque Removal.	1	2	1	1	As a periodontologist, I would recommend electric toothbrushes to the following groups of patients:Patients with Periodontal Disease, Patients with Orthodontic Appliances, Patients with Limited Dexterity, Patients with a Tendency for Aggressive Brushing, Patients Seeking Improved Oral Hygiene.	1	2	1	1	As a periodontologist, I would advise that electric toothbrushes can be beneficial for a wide range of individuals, especially those who have difficulty maintaining proper brushing technique with a manual toothbrush. This includes people with limited dexterity, such as those with arthritis, as well as those with braces or dental appliances that make manual brushing challenging. Electric toothbrus…	1	2	2	2	Electric toothbrushes can be beneficial for most people, but they are particularly recommended for: Individuals with Limited Mobility, Those with Orthodontic Appliance, People with Gum Disease, Those with a Tendency to Brush Too Hard.	1	2	2	2	As a periodontologist, I would advise that electric toothbrushes can be beneficial for most people, especially those with limited manual dexterity, such as individuals with arthritis or other physical limitations. They are also helpful for patients with orthodontic appliances like braces, as they can clean around brackets and wires more effectively. Additionally, those who have a tendency to brus…	1	2	2	2	Electric toothbrushes can be beneficial for most people, but they are particularly recommended for individuals with limited dexterity, such as those with arthritis, as well as for those who have difficulty effectively cleaning their teeth with a manual toothbrush. Additionally, some studies suggest that electric toothbrushes can be more effective in reducing plaque and gingivitis, which is partic…	1	2	2	2	Electric toothbrushes can be beneficial for most people, but they are especially recommended for: Those with Limited Dexterity, Those with Orthodontic Appliances, Those with Gum Disease,Children,Those Seeking a Deeper Clean.	2	2	N/A	2	As a periodontologist, I would recommend electric toothbrushes for the following individuals: Those with Limited Mobility, People with Orthodontic Appliances, Those with a History of Gum Disease,Individuals with a Tendency for Aggressive Brushing,People Looking for Improved Plaque Removal.	1	2
Q13	Do electric toothbrushes provide more effective cleaning than manual toothbrushes in removing plaque?	Yes, electric toothbrushes are generally considered more effective than manual toothbrushes in removing plaque. Studies have shown that electric toothbrushes, especially those with oscillating-rotating or sonic technology, can remove more plaque and reduce gingivitis more effectively than manual brushing. However, it's important to note that proper brushing technique and consistency are also cruc…	2	2	N/A	2	Yes, electric toothbrushes are generally more effective than manual toothbrushes in removing plaque. Clinical studies have shown that electric toothbrushes, especially those with oscillating-rotating or sonic technology, can remove more plaque and reduce gingivitis more effectively than manual toothbrushes. However, the effectiveness of any toothbrush also depends on the brushing technique and fr…	2	2	N/A	2	Yes, electric toothbrushes are generally more effective than manual toothbrushes in removing plaque. Studies have shown that electric toothbrushes can reduce plaque and gingivitis more effectively than manual toothbrushes, particularly in hard-to-reach areas. However, it's important to note that proper brushing technique and consistency are also crucial factors in maintaining oral health.	2	2	N/A	2	Yes, electric toothbrushes are generally considered more effective than manual toothbrushes in removing plaque. Studies have shown that electric toothbrushes can reduce plaque and gingivitis more effectively than manual brushing, especially in hard-to-reach areas. However, the effectiveness of any toothbrush depends on the brushing technique and the consistency of use.	2	2	N/A	2	Yes, electric toothbrushes are generally considered more effective than manual toothbrushes in removing plaque. Studies have shown that electric toothbrushes can reduce more plaque and gingivitis than manual toothbrushes over time. This is especially true for oscillating-rotating electric toothbrushes. However, the effectiveness also depends on your brushing technique and the condition of your gu…	2	2	N/A	2	Yes, electric toothbrushes have been shown to be more effective than manual toothbrushes in removing plaque. Studies have found that electric toothbrushes can reduce plaque and gingivitis more effectively, especially those with oscillating-rotating or sonic technology. However, it's important to use the right brushing technique and maintain good oral hygiene practices regardless of the type of to…	2	2	N/A	2	Yes, electric toothbrushes can provide more effective cleaning than manual toothbrushes in removing plaque. Studies have shown that electric toothbrushes, especially those with oscillating-rotating or sonic technology, can reduce plaque and gingivitis more effectively than manual toothbrushes over both short and long-term use. However, it's important to note that proper brushing technique and con…	2	2	N/A	2	Yes, electric toothbrushes can be more effective than manual toothbrushes in removing plaque. Studies have shown that electric toothbrushes, especially those with oscillating-rotating or sonic technology, can remove more plaque and reduce gingivitis more effectively than manual toothbrushes when used properly. However, it's important to note that technique and consistency in brushing are also cru…	2	2	N/A	2	Yes, electric toothbrushes are generally more effective than manual toothbrushes in removing plaque. Studies have shown that electric toothbrushes can reduce plaque and gingivitis more effectively than manual brushing, especially in hard-to-reach areas. The oscillating and rotating movements of electric toothbrushes can provide a more thorough cleaning. However, it's important to note that proper…	2	2	N/A	2	Yes, electric toothbrushes have been found to be more effective than manual toothbrushes in removing plaque. Studies show that electric toothbrushes can reduce plaque and gingivitis more effectively than manual brushing, particularly in hard-to-reach areas.	2	2
Q14	Which ingredients/components do toothpastes contain to provide tartar control?	Typically, pyrophosphate compound is used in toothpaste to provide tartar control.	2	2	N/A	2	In toothpaste, components like pyrophosphate are commonly used to ensure tartar control.	2	2	N/A	2	Toothpastes typically contain active ingredients such as pyrophosphate, zinc citrate, zinc chloride, triclosan, to provide tartar control.	2	2	N/A	2	In toothpaste, active ingredients such as pyrophosphates are commonly used to provide tartar control.	2	2	N/A	2	Toothpaste ingredients for tartar control may include: fluoride, pyrophosphates, zinc phosphate, triclosan, calcium carbonate, calcium phosphate, silica/hydrated silica.	2	2	N/A	2	Toothpastes generally contain pyrophosphate to provide tartar control.	2	2	N/A	2	For toothpaste to provide tartar control, it generally needs to contain components such as pyrophosphate.	2	2	N/A	2	Tartar control in toothpaste is typically achieved with components like pyrophosphate	2	2	N/A	2	The components that generally provide tartar control in toothpaste include one or more of the following substances: Zinc citrate/zinc gluconate, pyrophosphates, fluoride, triclosan, sodium bicarbonate, sodium monofluorophosphate/sodium fluoride.	2	2	N/A	2	Toothpaste typically relies on effective components like calcium carbonate and pyrophosphate for tartar control.	2	2
Q15	Does using toothpaste enhance the effectiveness of brushing?	Yes, using toothpaste enhances the effectiveness of brushing.	2	2	N/A	2	Yes, using toothpaste enhances the effectiveness of brushing. Toothpaste contains various ingredients that work in different ways to improve the effectiveness of brushing, such as dissolving plaque and stains, strengthening tooth enamel (usually through fluoride content), improving gum health, and preventing bad breath.	2	2	N/A	2	Yes, using toothpaste enhances the effectiveness of brushing. Toothpaste may contain abrasives that help remove plaque and food debris, fluoride to help prevent tooth decay, and other components that can improve oral health.	2	2	N/A	2	Yes, using toothpaste enhances the effectiveness of brushing. Toothpastes contain abrasive substances that help remove plaque and food residues. Additionally, they may contain ingredients like fluoride for cavity protection, aromatic compounds for freshening breath, and antibacterial components to support gum health.	2	2	N/A	2	Yes, using toothpaste enhances the effectiveness of brushing. Toothpastes contain abrasive substances that help remove plaque and food residues. Additionally, they may contain substances like fluoride, which strengthen tooth enamel and provide additional protection against cavities.	2	2	N/A	2	Yes, using toothpaste enhances the effectiveness of brushing. Toothpastes are designed to help clean plaque and food residues more effectively. Additionally, most toothpaste contains fluoride, which strengthens tooth enamel and provides protection against cavities.	2	2	N/A	2	Yes, using toothpaste enhances the effectiveness of brushing. Toothpastes contain ingredients aimed at dissolving plaque and food residues, whitening teeth, eliminating bad breath, and preventing various oral health issues.	2	2	N/A	2	Yes, using toothpaste enhances the effectiveness of brushing. Toothpastes contain various components that support oral health.	2	2	N/A	2	Yes, using toothpaste enhances the effectiveness of brushing. Toothpastes contain abrasive substances that help clean plaque and food residues. Additionally, they may contain substances like fluoride, which strengthen tooth enamel and provide protection against cavities.	2	2	N/A	2	Yes, using toothpaste enhances the effectiveness of brushing. Toothpastes contain cleaning agents that help remove plaque and food residues. Additionally, they may contain cavity-preventing substances like fluoride and some include antiseptic components to protect against gum disease.	2	2
Q16	Are tartar control toothpastes effective in removing existing tartar deposits?	Tartar control toothpastes can help prevent the formation of new tartar deposits by reducing plaque accumulation, the precursor to tartar, but they cannot remove existing tartar.	2	2	N/A	2	Tartar control toothpastes are effective in preventing tartar formation to some extent but cannot remove existing tartar deposits.	2	2	N/A	2	Tartar control toothpastes can help prevent the formation of tartar by reducing plaque accumulation on your teeth. However, once tartar has formed , its too hard to be removed by a toothpaste. Tartar removal requires professional cleaning by a dental heathcare provider.	2	2	N/A	2	Tartar control toothpastes are formulated to help prevent the formation of tartar from plaque that has not yet hardened. Tartar control toothpastes cannot remove existing tartar deposits.	2	2	N/A	2	Tartar control toothpastes can help prevent the formation of tartar by reducing plaque accumulation on your teeth, but they cannot remove existing tartar deposits.	2	2	N/A	2	Tartar control toothpastes can help prevent the formation of tartar by reducing plaque accumulation on your teeth, but they are not effective at removing existing tartar deposits.	2	2	N/A	2	Tartar control toothpastes can help prevent tartar from forming on your teeth, but they are not designed to remove existing tartar deposits.	2	2	N/A	2	Tartar control toothpastes can help prevent the formation of new tartar deposits to some extend by reducing plaque accumulation, but they are not effective at removing existing tartar.	2	2	N/A	2	Tartar control toothpastes can help prevent the formation of new tartar deposits to some extend by reducing plaque accumulation, but they are not effective at removing existing tartar.	2	2	N/A	2	Tartar control toothpastes can help prevent tartar formation to some extend by reducing plaque accumulation,the precursor to tartar, but they cannot remove existing tartar deposits.	2	2
Q17	Individuals with periodontal disease should brush their teeth using which technique?	The most recommended technique is the modified Bass technique.	2	2	N/A	2	The modified Bass technique is often recommended for individuals with periodontal disease.	2	2	N/A	2	As a periodontologist, I would recommend the Bass technique for individuals with periodontal disease.	1	1	N/A	1	As a periodontologist advising you, a patient with periodontal disease, on proper brushing tecnique, I recommend using the ''bass tecnique'' for brushing your teeth.	1	1	N/A	1	As a periodontologist, the most appropriate recommendation for individuals with periodontal disease when it comes to brushing technique would be to use a soft-bristled toothbrush with the modified Bass technique.	2	2	N/A	2	As a periodontologist advising you, a patient with periodontal disease, on proper brushing tecnique, I recommend using the '' bass method'' for brushing your teeth.	1	1	N/A	1	As a periodontologist advising a patient with periodontal disease, I recommend using the modified Bass brushing technique.	2	2	N/A	2	As a periodontologist, my advise for paitent with periodontal disease regarding tooth brushing technique would be to use a soft-bristled toothbrush and adopt the modified Bass technique.	2	2	N/A	2	The recommend technique is the modified Bass technique.	2	2	N/A	2	As a periodontologist, the most recommended technique for individuals with periodontal disease to brush their teeth is the modified Bass technique.	2	2
Q18	Is there any difference in removing interdental plaque between using manual dental floss with fingers or dental floss holders?	Yes, there is a difference between using manual dental floss with your fingers and using dental floss holders, primarily in terms of technique effectiveness, ease of use, and accessibility to different parts of the mouth.	1	1	N/A	1	Yes, there is a difference between using manual dental floss with your fingers and using dental floss holders, primarily in terms of technique, ease of use, and effectiveness for different individuals.	1	1	N/A	1	Both methods can be effective for interdental plaque removal when used properly. The key to effective plaque removal lies in the correct technique and regularity of flossing rather than the type of flossing device used. It's important to be gentle to avoid damaging the gums and to make sure the floss wraps around each tooth in a "C" shape, gently cleaning below the gumline as well as the sides of…	2	2	N/A	2	Yes, there is a difference in the effectiveness and ease of use between using manual dental floss with fingers and using dental floss holders, but the primary goal of both methods is to remove interdental plaque effectively.	1	1	N/A	1	Yes, there is a difference between using manual dental floss with your fingers and using dental floss holders, mainly in terms of technique and effectiveness, but both methods aim to remove interdental plaque effectively if used correctly.	2	1	1	1	Yes, there is a difference in the effectiveness of removing interdental plaque between using manual dental floss with fingers and using dental floss holders, though both methods aim to achieve the same goal of cleaning between the teeth where a toothbrush can't reach.	1	1	N/A	1	Yes, there is a difference in removing interdental plaque between using manual dental floss with fingers and dental floss holders, primarily related to technique effectiveness and ease of use.	1	1	N/A	1	Yes, there is a difference between using manual dental floss with your fingers and using dental floss holders, but the effectiveness of either method largely depends on the user's technique and consistency.	1	2	2	2	Yes, there is a difference between using manual dental floss with fingers and using dental floss holders, primarily in terms of ease of use, technique, and effectiveness, which can vary depending on the individual's dexterity, preference, and specific dental conditions.	1	1	N/A	1	As a periodontologist, when discussing the effectiveness of removing interdental plaque, it's important to focus on technique and consistency rather than strictly the tools used. Both manual dental flossing with fingers and using dental floss holders can be effective in removing interdental plaque.	2	2
Q19	How to choose an appropriate interdental brush?	Choosing the right interdental brush for your needs is crucial for maintaining good oral health, especially in preventing and managing gum diseases. Here are some direct, practical tips for selecting an appropriate interdental brush:Size Matters, Wire Core, Quality and Durability, Handle Design, Consult Your Periodontologist or Dental Hygienist, Trial and Error.	1	1	N/A	1	Choosing the right interdental brush for your needs is important for maintaining gum health and preventing gum disease. Here's a straightforward guide to help you select an appropriate interdental brush:Size, Handle, Bristle Type, Durability, Ease of Use, Consultation with Dental Professionals.	1	1	N/A	1	Choosing the right interdental brush is essential for effective cleaning between your teeth, especially if you have larger gaps, braces, or dental implants. Here are the key factors to consider: Size, Brush Shape, Handle Design, Wire Core, Durability and Quality, Consultation.	1	1	N/A	1	Choosing an appropriate interdental brush is important for maintaining gum health and preventing periodontal diseases. Here's how to select the right one for your needs: Size, Handle Design, Quality and Durability, Comfort, Frequency of Use, Consultation with a Dental Professional.	1	1	N/A	1	Choosing an appropriate interdental brush is essential for maintaining good oral hygiene, especially for preventing gum disease. Here are the factors you should consider: Size, Brush Texture, Handle Design, Wire Core, Durability, Consultation, Trial and Error.	1	1	N/A	1	Choosing an appropriate interdental brush is important for maintaining good oral hygiene, especially for preventing gum diseases. As a periodontologist, I would recommend the following steps to select the most suitable interdental brush for your needs: Consider the Size, Check the Wire Core,Handle Design,Quality of Bristles,Seek Professional Advice,Trial and Error,Special Needs.	1	1	N/A	1	Choosing the right interdental brush for your needs involves considering several factors to ensure effective cleaning while protecting your gums and teeth. Here's how to choose an appropriate interdental brush:Size,Brush Shape,Handle Design,Wire Core,Bristle Type,Professional Recommendation,Trial and Error.	1	1	N/A	1	Choosing an appropriate interdental brush is important for maintaining good oral hygiene, especially for those with spaces between their teeth, under bridges, or around implants. As a periodontist, I would advise the following steps to select an appropriate interdental brush:Size,Handle Design,Bristle Type,Quality and Durability,Professional Recommendation,Trial and Error.	1	1	N/A	1	Choosing the right interdental brush for your needs is crucial for maintaining good oral hygiene, especially for preventing gum disease. Here are straightforward guidelines to help you select an appropriate interdental brush:Size Matters,Consult Your Dentist or Periodontist,Brush Design,Handle Comfort,Quality and Durability,Frequency of Replacement,Trial and Error.	1	1	N/A	1	Choosing the right interdental brush is an essential part of maintaining oral hygiene and preventing gum disease. Here are some straightforward guidelines to help you select an appropriate interdental brush:Consider the Size of the Spaces Between Your Teeth,Check the Brush's Wire Core,Look at the Brush Shape and Design,Quality and Durability,Handle Comfort and Ease of Use,Ask Your Dental Professi…	1	1
Q20	In patients with moderate to severe periodontitis, is it more appropriate to use dental floss or interdental brushes?	For patients with moderate to severe periodontitis, it's often more appropriate to use interdental brushes rather than traditional dental floss. This recommendation is based on the fact that interdental brushes are more effective at removing plaque and debris from larger gaps between teeth, which are more common in cases of moderate to severe periodontitis. These brushes can reach into and clean …	2	2	N/A	2	For patients with moderate to severe periodontitis, it is generally recommended to use interdental brushes over dental floss. This is because interdental brushes are more effective at removing plaque and debris from larger gaps between the teeth.	2	2	N/A	2	For patients with moderate to severe periodontitis, interdental brushes are generally recommended over dental floss. This is because interdental brushes are more effective at removing plaque and debris from larger gaps between the teeth.Dental floss, while effective for cleaning between teeth with tight contacts, may not be able to adequately clean the larger and more irregular spaces that are ch…	2	2	N/A	2	For patients with moderate to severe periodontitis, interdental brushes are often more appropriate and effective than dental floss. This is because interdental brushes can more effectively clean larger gaps between teeth and below the gumline. Dental floss is better suited for cleaning between teeth with tight contacts where interdental brushes cannot fit. However, for those with larger spaces du…	2	2	N/A	2	For patients with moderate to severe periodontitis, it's generally recommended to use interdental brushes over dental floss.Dental floss is still useful for cleaning tight spaces between teeth where the gums are healthy and not receded, but in the context of periodontitis, where there are often larger gaps between teeth and below the gum line, interdental brushes can provide a more thorough clean…	2	2	N/A	2	In the management of moderate to severe periodontitis, interdental brushes are generally more effective than dental floss for cleaning between the teeth where the gaps are wider due to gum recession and bone loss. Interdental brushes can more effectively remove plaque and debris from these larger spaces. Floss is better suited for cleaning between teeth with minimal space where interdental brushe…	2	2	N/A	2	Interdental brushes are generally considered more effective for cleaning between teeth in cases of moderate to severe periodontitis, especially when there are larger gaps between the teeth or when the patient has recessed gums, which is common in more advanced gum disease. They can more effectively remove plaque and debris from these wider spaces and below the gum line compared to traditional flo…	2	2	N/A	2	For patients with moderate to severe periodontitis, interdental brushes are generally considered more appropriate and effective than traditional dental floss. This is because interdental brushes can more effectively clean the larger gaps between teeth and under the gumline where periodontitis tends to cause the most damage.	2	2	N/A	2	For patients with moderate to severe periodontitis, interdental brushes are often more effective than dental floss. This is because interdental brushes can more effectively clean the larger gaps between teeth that are common in patients with significant gum disease. They can also more easily remove plaque and debris from below the gumline in these widened spaces. Dental floss is still useful, par…	2	2	N/A	2	For patients with moderate to severe periodontitis, interdental brushes are generally more appropriate and effective than dental floss. This is because interdental brushes are better at removing plaque and debris from larger gaps between teeth and under the gum line.Dental floss is very effective for cleaning between teeth with tight contacts and minimal gum recession, but may not be as effective…	2	2
Q21	How should interdental brushes be used?	Here's a straightforward guide on how to use them:It's important to select the one that fits comfortably between your teeth.Gently insert the brush between your teeth. Once inserted, gently move the brush back and forth a few times to remove plaque and debris. Use the brush on both sides of each space between your teeth.After using the brush in each interdental space, rinse it under water.Use int…	2	2	N/A	2	Here's how to use interdental brushes properly: It's important to choose the right size for the spaces between your teeth.Gently insert the brush between your teeth.Move the brush back and forth a few times in each interdental space.For the front teeth, insert the brush at a straight angle. For the back teeth, you may need to angle the brush slightly to reach effectively.Use the interdental brush…	2	2	N/A	2	As a periodontologist, I'd advise the following straightforward steps for using interdental brushes to effectively clean between your teeth, which is crucial for gum health:It's essential to choose the correct size for your teeth.Gently insert the brush between your teeth.Once inserted, gently move the brush back and forth a few times to remove plaque and food particles.Use the interdental brush …	2	2	N/A	2	As a periodontologist, here's a direct guide on how to use them:It's important to choose a size that fits comfortably between your teeth without forcing it.Gently insert the brush between your teeth at the gum line.Once the brush is in, gently move it back and forth a few times to remove plaque and debris.It's crucial to clean both the front and back teeth, including the spaces behind your last m…	2	2	N/A	2	Here's a straightforward guide on how to use interdental brushes correctly: It's important to select a size that fits comfortably into the spaces between your teeth. Gently insert the brush into the space between your teeth at a straight or slightly angled position. Once the brush is inserted, gently move it back and forth a few times to remove plaque and debris.Repeat this process for each space…	2	2	N/A	2	As a periodontologist, my advice on using interdental brushes would be to follow these steps for effective cleaning between your teeth, which is crucial for gum health:It's important to select a size that fits comfortably between your teeth.Gently insert the brush between your teeth. Once inserted, move the brush back and forth a few times to remove plaque and food particles. Adjust the angle as …	2	2	N/A	2	Here's how to use them correctly:It's important to choose an interdental brush of the appropriate size for your gaps between the teeth. Gently insert the brush between your teeth.Once the brush is inserted, move it back and forth a few times to remove plaque and food particles. For the best results, try to approach each space from multiple angles, especially for the back teeth.After you've cleane…	2	2	N/A	2	Here's how you should use them: It's important to select a size that fits snugly but comfortably.Gently insert the brush between your teeth.Once inserted, gently move the brush back and forth a few times.For the front teeth, you can use the brush directly. For the back teeth, it might be helpful to bend the brush slightly (if the product allows) for better access.After using the brush in one spac…	2	2	N/A	2	Here's a direct and precise guide on how to use them:It's essential to select an interdental brush of the appropriate size for your interdental spaces.Gently insert the brush between your teeth.Once inserted, move the brush back and forth a few times.Use the brush on all interdental spaces.After use, rinse the interdental brush under running water to clean it. Use the interdental brush at least o…	2	2	N/A	2	To use interdental brushes effectively, follow these steps:It's essential to choose the right size for your gaps.Gently insert the brush between your teeth.Once inserted, move the brush back and forth a few times.For the front teeth, it might be easier to insert the brush vertically. For back teeth, it's often more effective to approach from the side.After using, rinse the brush under running wat…	2	2
Q22	Can using toothpicks help remove dental plaque, or do they harm the gums?	Using toothpicks can help remove food particles stuck between teeth, but they must be used correctly to avoid harming the gums.Toothpicks should not be used aggressively or forcefully, as this can damage the gum tissue and possibly lead to gum recession or injury. It's also possible to push debris further between the teeth or beneath the gum line, leading to further dental issues.For removing den…	2	2	N/A	2	Using toothpicks can help remove larger food particles stuck between teeth, but they are not very effective against dental plaque, which adheres to the tooth surface. Toothpicks can be harsh on the gums if not used carefully, potentially causing injury or irritation. For optimal removal of plaque and to avoid harming your gums, it's best to use dental floss or interdental brushes, as recommended …	1	2	2	2	Using toothpicks can help in removing larger food particles stuck between the teeth, but they must be used carefully to avoid harming the gums. Toothpicks can potentially push against the gums or scratch them, leading to irritation, injury, or even gum recession over time if used improperly or too aggressively.For best oral health practices, it's advisable to use dental floss or interdental brush…	2	2	N/A	2	Using toothpicks can help remove food particles between the teeth, but they must be used carefully to avoid damaging the gums. If used improperly or too aggressively, toothpicks can injure the gums, potentially leading to irritation, inflammation, or even recession of the gum tissue. It's generally safer and more effective to use dental floss or interdental brushes for cleaning between the teeth,…	2	2	N/A	2	Using toothpicks can help remove food particles between the teeth, which might indirectly reduce plaque buildup by limiting the substrate bacteria need to thrive.However, if not used carefully, toothpicks can harm the gums. It's essential to use toothpicks gently and not to force them into tight spaces between your teeth.Dental floss or interdental brushes are generally recommended by dental prof…	2	2	N/A	2	Using toothpicks can help remove larger pieces of food debris from between your teeth, but they are not effective at removing dental plaque when compared to dental floss or interdental brushes. It's important to use toothpicks gently to avoid harming the gums. Aggressive or improper use can injure the gums and potentially lead to gum damage or recession. For effectively removing plaque and mainta…	2	2	N/A	2	Using toothpicks can help remove food particles stuck between your teeth. However, if not used carefully, they can harm the gums. Toothpicks can cause abrasion or injury to the gums, leading to irritation or damage. It's essential to use them gently and not force them into tight spaces. For effective plaque removal, dental professionals typically recommend using floss, as it is specifically desig…	2	2	N/A	2	Using toothpicks can help in removing food particles from between the teeth, but they must be used carefully to avoid damaging the gums. Toothpicks can potentially harm the gums if used aggressively or improperly, leading to irritation, injury, or even recession of the gums.For effectively removing dental plaque and maintaining gum health, dental professionals typically recommend using floss or i…	2	2	N/A	2	Using toothpicks can help in removing food particles from between the teeth, which might indirectly reduce the accumulation of dental plaque if used carefully. However, there are a few important considerations to keep in mind: If not used gently, toothpicks can cause harm to the gums.Toothpicks are not effective at removing plaque that adheres to the teeth surfaces; they are more suited for dislo…	1	2	2	2	Using toothpicks can help remove food particles stuck between teeth.If used too aggressively or improperly, toothpicks can cause injury to the gums, potentially leading to irritation, bleeding, or damage to the soft tissue. It's important to use them gently and not to force them into tight spaces between teeth. For plaque removal and gum health, dental professionals often recommend using floss or…	2	2
Q23	Are oral irrigators (water flossers) more effective than toothbrushes in removing dental plaque?	Research has shown that combining the use of a toothbrush with an oral irrigator can enhance overall plaque removal and improve gum health, more so than using either device alone. Oral irrigators, on the other hand, use a stream of pulsating water to clean between teeth and below the gumline, areas that are more challenging for toothbrushes to reach effectively. While oral irrigators are excellen…	2	1	2	2	Oral irrigators, use a stream of pulsating water to rinse away food particles and debris from teeth, gums, and hard-to-reach areas of the mouth, such as between teeth and below the gumline. They are especially helpful for cleaning around orthodontic appliances (like braces) and dental implants. While oral irrigators can be effective for flushing out debris from these areas, research indicates the…	2	2	N/A	2	In summary, while oral irrigators are effective for cleaning areas that are hard to reach with a toothbrush or floss and can improve gum health, they are not more effective than toothbrushes in removing dental plaque. Both tools should be used complementarily as part of a comprehensive oral hygiene regimen.	2	2	N/A	2	While oral irrigators can be an effective addition to your oral hygiene routine, especially for interdental cleaning and improving gum health, they are not considered a replacement for brushing. Toothbrushing is essential for removing plaque from the surfaces of the teeth, which is not something that oral irrigators are designed to do as effectively.	1	2	2	2	No, oral irrigators are not more effective than toothbrushes in removing dental plaque from the surface of the teeth. Both tools should be used complementarily for optimal oral health, with toothbrushes removing plaque from the tooth surfaces and oral irrigators cleaning between the teeth and below the gumline.	1	2	2	2	They can be particularly useful for cleaning hard-to-reach areas that a toothbrush might miss and for people with braces or other types of dental work. However, while oral irrigators are effective at flushing out debris and may help to reduce gingivitis by cleaning beneath the gumline, they are not considered a substitute for brushing because they do not remove plaque as effectively as a toothbru…	2	2	N/A	2	Oral irrigators, on the other hand, use a stream of pulsating water to clean between teeth and below the gumline, areas that are difficult to reach with a toothbrush. They are particularly useful for cleaning around orthodontic appliances, bridges, implants, and in pockets that can form as a result of gum disease. While water flossers can be very effective for flushing out food particles and bact…	2	2	N/A	2	Oral irrigators are effective in flushing out food particles and debris from hard-to-reach places, they are generally not considered a substitute for brushing when it comes to removing plaque. Toothbrushing is essential for physically removing plaque.Oral irrigators can be an excellent addition to oral hygiene routines, especially for individuals with braces, dental implants, or those who struggl…	2	2	N/A	2	Regarding the effectiveness in removing dental plaque, studies suggest that while oral irrigators can significantly reduce bleeding and gingivitis, they might not be as effective as traditional toothbrushing and flossing at removing plaque. This is because the mechanical action of brushing with a toothbrush and the use of dental floss can physically remove plaque from the teeth surfaces and inter…	2	2	N/A	2	Oral irrigators, on the other hand, use a stream of pulsating water to rinse away food particles and debris from between the teeth and below the gumline, areas that can be difficult to reach with a toothbrush alone. While they can be very effective for cleaning between the teeth and improving gum health, they are not considered a substitute for brushing because they do not remove plaque from the …	2	2
Q24	Can bad breath (halitosis) be prevented by using mouthwash?	Mouthwash can help reduce bad breath (halitosis) temporarily by masking odors and killing bacteria that contribute to bad breath. However, it's not a cure-all. Effective prevention of bad breath involves a combination of good oral hygiene practices. This includes regular brushing and flossing to remove food particles and plaque, cleaning your tongue, staying hydrated to encourage saliva productio…	2	2	N/A	2	Using mouthwash can help reduce bad breath, also known as halitosis, by temporarily reducing the number of bacteria in your mouth and freshening your breath. However, it's important to note that mouthwash does not address the underlying causes of bad breath. Common causes of halitosis include poor oral hygiene, gum disease, dental cavities, and trapped food particles. Addressing these issues ofte…	2	2	N/A	2	Yes, mouthwash can help prevent bad breath (halitosis) temporarily by reducing the number of bacteria in your mouth, which are often a cause of bad breath. However, it's important to address the underlying cause of halitosis, which may involve oral hygiene practices such as regular brushing and flossing, and addressing any gum diseases or dental issues. Mouthwash should not be considered a standa…	2	2	N/A	2	Yes, mouthwash can help prevent bad breath (halitosis) temporarily by reducing the amount of bacteria in your mouth, which are often the cause of bad breath. However, it's important to note that mouthwash alone might not address the underlying cause of persistent bad breath. Good oral hygiene practices, such as regular brushing and flossing, are essential. For chronic bad breath, it's important t…	2	2	N/A	2	Yes, mouthwash can help prevent bad breath (halitosis) by reducing the amount of bacteria in your mouth, which are often the cause of bad breath. However, it's important to address the underlying cause of halitosis as well. This can include practicing good oral hygiene, such as brushing your teeth twice a day, flossing daily, and visiting a dentist regularly for check-ups and cleanings. Remember,…	2	2	N/A	2	Mouthwash can help in preventing bad breath (halitosis) to some extent by reducing the amount of bacteria in your mouth, freshening your breath, and decreasing the food particles that may remain after brushing and flossing. However, it's important to note that mouthwash alone is not a cure for bad breath caused by underlying gum diseases or other dental issues. For halitosis related to gum diseas…	2	2	N/A	2	Mouthwash can help in preventing bad breath (halitosis) by temporarily reducing the number of bacteria in your mouth, which are often responsible for bad breath. However, it's important to note that mouthwash should not be considered a standalone solution for halitosis. Effective prevention and treatment of bad breath typically require a comprehensive oral hygiene routine that includes regular br…	2	2	N/A	2	Yes, using mouthwash can help prevent bad breath (halitosis) to some extent, especially if it contains antiseptic ingredients that reduce bacteria in the mouth.However, it's important to note that mouthwash should not be used as a sole solution for bad breath. Proper oral hygiene practices, such as brushing twice daily with fluoride toothpaste, flossing once a day, and regular dental check-ups, a…	2	2	N/A	2	Yes, using mouthwash can help prevent bad breath (halitosis) to some extent. Mouthwash can temporarily reduce the number of bacteria in your mouth, which are often the cause of bad breath. However, it's important to note that not all causes of halitosis can be addressed with mouthwash alone. Proper oral hygiene practices, including regular brushing and flossing, are crucial for preventing bad bre…	2	2	N/A	2	Mouthwash can help in reducing bad breath (halitosis), especially if it contains antibacterial agents or components that neutralize odors. However, its effectiveness can be temporary and may not address the root cause of halitosis. Bad breath often results from poor oral hygiene, gum disease, dry mouth, or external factors like food, smoking, and certain health conditions.	2	2
Q25	Is the combined use of mouth rinses (e.g., Chlorhexidine, Listerine) with oral irrigators more effective than using oral irrigators with water alone in individuals with periodontal disease?	Yes, the combined use of mouth rinses, such as Chlorhexidine and Listerine, with oral irrigators can be more effective than using oral irrigators with water alone in individuals with periodontal disease. This effectiveness comes from the added antimicrobial properties of mouth rinses, which can help to reduce plaque, control gingivitis, and decrease the levels of bacteria associated with periodon…	2	2	N/A	2	Using mouth rinses like Chlorhexidine and Listerine in conjunction with oral irrigators can offer enhanced benefits over using oral irrigators with water alone, especially for individuals with periodontal disease. This combined approach can help in several ways:Antimicrobial Effect,Plaque Control,Anti-inflammatory Properties.	2	2	N/A	2	Yes, the combined use of mouth rinses, such as Chlorhexidine and Listerine, with oral irrigators is generally considered to be more effective than using oral irrigators with water alone for individuals with periodontal disease. This effectiveness is attributed to the antimicrobial properties of the mouth rinses, which can help reduce the levels of harmful bacteria in the periodontal pockets and o…	2	2	N/A	2	Yes, the combined use of mouth rinses, such as Chlorhexidine or Listerine, with oral irrigators is generally considered more effective than using oral irrigators with water alone in individuals with periodontal disease. This approach can offer enhanced benefits for reducing plaque, controlling gingivitis, and improving overall oral health.	2	2	N/A	2	Yes, using mouth rinses like Chlorhexidine and Listerine in combination with oral irrigators is generally more effective than using oral irrigators with water alone in individuals with periodontal disease. This effectiveness is attributed to the antimicrobial properties of the mouth rinses, which help to reduce the bacterial load in the periodontal pockets and on the tooth surfaces.	2	2	N/A	2	Yes, the combined use of antimicrobial mouth rinses, such as Chlorhexidine or Listerine, with oral irrigators is generally more effective than using oral irrigators with water alone in individuals with periodontal disease. This effectiveness is due to the antimicrobial properties of the mouth rinses, which help to reduce the bacterial load in the periodontal pockets and on the surface of the teet…	2	2	N/A	2	Yes, the combined use of mouth rinses, such as Chlorhexidine and Listerine, with oral irrigators is more effective than using oral irrigators with water alone for individuals with periodontal disease. Mouth rinses containing antimicrobial agents like Chlorhexidine are effective in reducing plaque and gingivitis. When used in conjunction with an oral irrigator, they can help deliver the antimicrob…	2	2	N/A	2	Yes, the combined use of mouth rinses like Chlorhexidine or Listerine with oral irrigators is generally considered more effective than using oral irrigators with water alone for individuals with periodontal disease. This effectiveness is due to the antimicrobial properties of the mouth rinses, which help to reduce the bacterial load in the periodontal pockets and on the tooth surfaces.	2	2	N/A	2	Yes, the combined use of mouth rinses (such as Chlorhexidine, Listerine) with oral irrigators is generally considered more effective than using oral irrigators with water alone in individuals with periodontal disease. This approach can enhance the removal of plaque, reduce the levels of bacteria in the periodontal pockets, and consequently decrease inflammation and bleeding.	2	2	N/A	2	Yes, the combined use of antimicrobial mouth rinses such as Chlorhexidine or Listerine with oral irrigators is generally more effective than using oral irrigators with water alone for individuals with periodontal disease. This is because the antimicrobial agents in the mouth rinses can help to reduce the levels of harmful bacteria in the periodontal pockets and on the tooth surfaces.	2	2
Q26	How should an oral irrigator be used?	Here's how to use it effectively:Fill the device's reservoir with lukewarm water.Choose the appropriate tip for your needs.Start with the lowest pressure setting and gradually increase to a comfortable level. Position yourself so that you're leaning over the sink.Activate the oral irrigator. Guide the tip along the gumline and between your teeth, pausing briefly between each tooth. Ensure you cov…	1	1	N/A	1	Here's a straightforward guide on how to use it effectively:Fill the device's reservoir with lukewarm water. Attach the appropriate tip to the handle. Start with the lowest pressure setting, especially if you're new to using an oral irrigator. Lean over the sink and place the tip in your mouth.Turn on the device. Begin with the back teeth and move the tip along the gumline, pausing briefly betwee…	1	1	N/A	1	Here’s how to use it accurately:Fill the device’s reservoir with lukewarm water to avoid sensitivity.Select the Right Tip for general cleaning or specific needs.Start with the Lowest Pressure Setting.Lean Over the Sink.Turn the unit on. Start from the back of the mouth and work your way forward, aiming the water stream at the gumline at a 90-degree angle.Be sure to clean both the outside and insi…	1	1	N/A	1	As a periodontologist advising on the use of an oral irrigator (also known as a water flosser), it's important to follow these steps for effective use:Begin by filling the device's reservoir with lukewarm water. Select the appropriate tip for your needs. Start with the lowest pressure setting and gradually increase it to a comfortable level. Lean Over the Sink.Aim the tip at a 90-degree angle to …	1	1	N/A	1	As a periodontologist, I'd recommend the following steps to use an oral irrigator effectively:Fill the Reservoir.Select the Right Tip for your needs. Adjust the Pressure Setting.Lean Over the Sink.Aim the tip at a 90-degree angle to the gumline. Make sure to irrigate all areas of your mouth, including the front and back sides of your teeth, as well as hard-to-reach areas like the back molars.For …	1	1	N/A	1	As a periodontologist advising on the use of an oral irrigator, here are straightforward instructions for its use:Fill the Reservoir.Attach the tip that meets your specific dental needs.Start with the lowest pressure setting and gradually increase to a comfortable level.Lean Over the Sink.Aim it at the gumline at a 90-degree angle.Focus on all areas of your mouth, including front and back sides o…	1	1	N/A	1	Here’s a straightforward guide on how to use it properly:Fill the Reservoir.Select the Right Tip.Start with the lowest pressure setting and gradually increase it as you become more accustomed to the sensation.Lean Over the Sink.Turn On the Device.Gently guide the tip along the gumline and between your teeth. Spend a few seconds on each tooth, ensuring you clean both the outer and inner surfaces o…	1	1	N/A	1	Here's how to use it effectively:Fill the Reservoir.Choose the appropriate tip for your needs. Adjust the Pressure Setting.Lean Over the Sink. Turn on the device. Begin with the back teeth and move the tip along the gumline, pausing briefly between teeth. Make sure to clean both the inside and outside of the teeth and gumline.Pay special attention to hard-to-reach areas, including around crowns, …	1	1	N/A	1	Here's a straightforward guide to using one:Fill the Reservoir.Choose the appropriate tip for your needs.Start with the Lowest Pressure.Lean Over the Sink.Start with the back teeth and move towards the front. Guide the tip along the gumline and pause briefly between teeth to ensure thorough cleaning.Adjust the Pressure as Needed.Use Daily.Follow the manufacturer's instructions for cleaning and ma…	1	1	N/A	1	Here's how to use it effectively:Fill the Reservoir.Choose the Right Tip.Start with the lowest pressure setting and gradually increase to a comfortable level. Lean Over the Sink.Turn On the Device.Glide the Tip Along the Gumline.Start from the back of your mouth on one side and work your way around to the other side to ensure you don't miss any spots. Position the tip at a 90-degree angle to the …	1	1
Q27	Does using oral irrigators (mouth irrigator) damage the gums?	As a periodontologist, I can tell you that using oral irrigators, also known as water flossers, is generally considered safe and can be an effective way to clean between the teeth and along the gumline. When used correctly, oral irrigators should not damage the gums. In fact, they can help reduce gingivitis and remove plaque.However, it's important to use the oral irrigator with the appropriate p…	2	2	N/A	2	As a periodontologist, I would advise that oral irrigators, also known as water flossers, do not typically damage the gums when used properly. They can be a helpful tool for cleaning between the teeth and along the gumline, especially for people with braces or dental implants. However, it's important to use them with the correct pressure setting and technique to avoid any potential harm. If you h…	2	2	N/A	2	As a periodontologist, I can tell you that using an oral irrigator, also known as a water flosser, does not typically damage the gums when used correctly. In fact, it can be a helpful tool for removing plaque and debris from between the teeth and along the gumline, especially for those who have difficulty using traditional floss. However, it's important to use the irrigator with the appropriate p…	2	2	N/A	2	As a periodontologist, I would advise that using an oral irrigator, or water flosser, can be beneficial for your gum health when used properly. It helps remove plaque and food particles from between your teeth and below the gumline, which are areas that traditional brushing might miss. However, it's important to use it with the correct technique and pressure settings to avoid potential damage to …	2	2	N/A	2	As a periodontologist, I can assure you that oral irrigators, also known as water flossers, are generally safe for your gums when used correctly. They can be an effective tool for removing plaque and debris from between the teeth and along the gumline. However, it's important to use them with the appropriate pressure settings and techniques to avoid potential damage to the gums. If you have sensi…	2	2	N/A	2	As a periodontologist, I can tell you that using oral irrigators, also known as water flossers, does not typically damage the gums when used correctly. These devices can be a helpful tool for removing plaque and food particles from between the teeth and below the gumline, which can reduce the risk of gum disease.However, it's important to use the oral irrigator with the proper technique and setti…	2	2	N/A	2	As a periodontologist, I can tell you that oral irrigators, also known as water flossers, are generally safe for most people when used correctly. They can be an effective tool for removing plaque and debris from between teeth and below the gumline. However, if used improperly or with excessive force, they can potentially cause damage to the gums. It's important to follow the manufacturer's instru…	2	2	N/A	2	Using oral irrigators, also known as water flossers, is generally considered safe for the gums when used correctly. They can be an effective tool for removing plaque and food particles from between the teeth and below the gumline. However, it's important to use them at the right pressure setting and with the correct technique to avoid causing any damage to the gums.	2	2	N/A	2	Oral irrigators, also known as water flossers, are generally safe for most people when used correctly. They can be an effective tool for cleaning between the teeth and along the gumline, and they can help reduce plaque and gingivitis. However, if used with too much pressure or if directed improperly, they could potentially cause damage to the gums. It's important to follow the manufacturer's inst…	2	2	N/A	2	As a periodontologist, I can tell you that oral irrigators, also known as water flossers, are generally considered safe for most people when used correctly. They can be an effective tool for removing food particles and plaque from between the teeth and along the gumline. However, it's important to use them properly to avoid potential damage to the gums.	2	2
Q28	Is using only mouth rinses (such as Chlorhexidine or essential oil-based ones like Listerine) without daily oral hygiene habits sufficient to maintain gingival health?	No, using mouth rinses alone, such as Chlorhexidine or essential oil-based ones like Listerine, is not sufficient to maintain gingival health. Mouth rinses can be an adjunctive measure to help reduce plaque and gingivitis but should not be used as a substitute for mechanical plaque removal methods like brushing and flossing.	2	2	N/A	2	As a periodontologist, I would inform you that using mouth rinses alone, such as Chlorhexidine or essential oil-based ones like Listerine, is not sufficient to maintain optimal gingival (gum) health. Mouth rinses can be a helpful adjunct especially in reducing bacteria and temporarily lowering the risk of infection or inflammation. However, they cannot replace mechanical cleaning methods for effe…	2	2	N/A	2	While mouth rinses can be beneficial, they should not be used as the sole method of oral hygiene. Daily brushing and flossing are essential for maintaining gingival health.	2	2	N/A	2	Using only mouth rinses, such as Chlorhexidine or essential oil-based ones like Listerine, without adhering to daily oral hygiene habits, is not sufficient to maintain optimal gingival (gum) health. While these mouthwashes can help reduce plaque and the bacteria that cause gum disease, they are not a substitute for mechanical cleaning methods.	2	2	N/A	2	Using mouth rinses alone, whether Chlorhexidine or essential oil-based like Listerine, is not sufficient to maintain gingival (gum) health. Mouth rinses can be a helpful adjunct to brushing and flossing, particularly for reducing bacteria and temporarily reducing bad breath. However, they do not replace the mechanical removal of plaque that brushing and flossing provide.	2	2	N/A	2	No, using only mouth rinses, such as Chlorhexidine or essential oil-based ones like Listerine, without daily oral hygiene habits, is not sufficient to maintain gingival health. While mouth rinses can play an adjunctive role in the management of oral bacteria and can help in reducing plaque and gingivitis, they do not replace the mechanical removal of plaque achieved through brushing and flossing.	2	2	N/A	2	No, using only mouth rinses, whether they're Chlorhexidine or essential oil-based like Listerine, is not sufficient to maintain gingival (gum) health. Mouth rinses can be a helpful addition to daily oral hygiene for reducing bacteria and temporarily reducing bad breath, but they cannot substitute for the mechanical removal of plaque through brushing and flossing.	2	2	N/A	2	Using only mouth rinses, whether chlorhexidine or essential oil-based like Listerine, without adhering to daily oral hygiene habits like brushing and flossing, is not sufficient to maintain gingival (gum) health. Mouth rinses can be an effective adjunct to mechanical cleaning methods, helping to reduce plaque, control gingivitis, and freshen breath. However, they are not a substitute for brushing…	2	2	N/A	2	No, using only mouth rinses, such as Chlorhexidine or essential oil-based ones like Listerine, without daily oral hygiene habits is not sufficient to maintain gingival health. While these mouth rinses can be effective in reducing plaque and controlling gingivitis to some extent, they are not a substitute for mechanical plaque removal methods like brushing and flossing.	2	2	N/A	2	No, using mouth rinses alone, such as Chlorhexidine or essential oil-based rinses like Listerine, is not sufficient to maintain gingival health. While these rinses can be effective in reducing plaque and the bacteria that cause gum diseases, they should not replace daily oral hygiene practices.	2	2
Q29	Does bleeding gums indicate a periodontal disease?	Yes, bleeding gums can be an indicator of periodontal disease, also known as gum disease. It's one of the most common signs that your gums may be inflamed, which is often caused by plaque buildup on your teeth. This condition can progress to more serious forms of periodontal disease if left untreated, leading to gum recession, bone loss, and potentially tooth loss. However, bleeding gums can also…	2	2	N/A	2	Bleeding gums can be a sign of periodontal (gum) disease, but it's not the only cause. If plaque is not removed by regular brushing and flossing, it can cause the gums to become inflamed, leading to conditions such as gingivitis, the earliest stage of gum disease. However, bleeding gums can also result from other factors, such as brushing too hard, using a toothbrush with hard bristles, or starti…	2	2	N/A	2	Bleeding gums can be a sign of periodontal disease, but not always. In the early stage, known as gingivitis, the gums become red, swollen, and may bleed during brushing or flossing.However, bleeding gums can also result from other causes like brushing too hard, using a hard-bristled toothbrush, or vitamin deficiencies.	2	2	N/A	2	Bleeding gums can be a sign of periodontal disease, but not always. It's one of the early symptoms of gingivitis, which is the initial stage of periodontal disease. Gingivitis is caused by the accumulation of plaque at the gum line, leading to inflammation of the gums.However, gums can also bleed for other reasons, such as aggressive brushing, using a hard toothbrush, or even due to hormonal chan…	2	2	N/A	2	Yes, bleeding gums can indicate periodontal disease. Periodontal disease, also known as gum disease, is a condition that affects the tissues supporting and surrounding the teeth. It typically starts with gingivitis, which is the inflammation of the gums. One of the early signs of gingivitis is bleeding gums, especially during brushing or flossing.	1	1	N/A	1	Bleeding gums can be a sign of periodontal disease, but not always. Periodontal diseases, including gingivitis and periodontitis, are serious infections that can lead to tooth loss if untreated. Gingivitis, the early stage of periodontal disease, often results in gum inflammation and bleeding. However, bleeding gums can also result from other factors, such as brushing too hard, using a hard-brist…	2	2	N/A	2	Yes, bleeding gums can be an indication of periodontal disease. It's one of the most common signs of gum disease, including gingivitis, which is the early stage of periodontal disease, and periodontitis, which is a more advanced stage.However, bleeding can also be caused by other factors, such as brushing too hard, using a hard-bristled toothbrush, or even changes in oral care routines.	2	2	N/A	2	Yes, bleeding gums can be a sign of periodontal (gum) disease. However, it's also important to note that bleeding gums can occur for a variety of reasons. Mild cases of gum bleeding can be caused by factors such as brushing too hard, using a hard-bristled toothbrush, or beginning a new flossing routine. However, consistent gum bleeding is often a sign of more serious conditions, such as gingiviti…	2	2	N/A	2	Yes, bleeding gums can be a sign of periodontal disease. It's typically caused by poor brushing and flossing habits that allow plaque—a sticky film of bacteria—to build up on the teeth and harden. In advanced stages, periodontal disease can lead to sore, bleeding gums; painful chewing problems; and even tooth loss. However, bleeding gums can also be caused by other factors such as brushing too ha…	2	2	N/A	2	Yes, bleeding gums can be a sign of periodontal (gum) disease. Periodontal disease starts with bacteria in the mouth infecting the tissue surrounding the tooth, leading to gingivitis, an early stage of gum disease characterized by red, swollen, and bleeding gums.However, bleeding gums can also result from other factors, such as brushing too hard, using a hard toothbrush, or even changes in hormon…	2	2
Q30	What are the symptoms of gum disease?	As a periodontologist, I would inform you that the symptoms of gum disease (periodontal disease) include:Red, swollen, or tender gums.Bleeding gums.Receding gums .Persistent bad breath or bad taste in the mouth.Loose or shifting teeth.New gaps forming between teeth.Pus between your teeth and gums.Pain when chewing.If you notice any of these symptoms, it's important to consult a dental professiona…	2	2	N/A	2	Certainly! The symptoms of gum disease (periodontal disease) include:Red, swollen, or tender gums.Bleeding gums while brushing or flossing.Gums that recede or pull away from the teeth, causing the teeth to look longer than normal.Loose or separating teeth.Pus between your gums and teeth.Sores in your mouth.Persistent bad breath.A change in the way your teeth fit together when you bite.A change in…	2	2	N/A	2	As a periodontologist, the symptoms of gum disease (periodontal disease) I'd advise you to watch for include:Red, swollen, or tender gums.Bleeding gums during or after tooth brushing.Receding gums which may make your teeth look longer than normal.Persistent bad breath or bad taste in the mouth.Loose or shifting teeth.Formation of deep pockets between teeth and gums.Changes in the way teeth fit to…	2	2	N/A	2	The symptoms of gum disease (periodontal disease) can vary depending on the severity of the condition, but common symptoms include:Red, swollen, or tender gums.Bleeding gums.Receding gums.Persistent bad breath or bad taste in the mouth.Loose or shifting teeth .Pain when chewing .Pus between your teeth and gums.Sensitive teeth.	2	2	N/A	2	As a periodontologist, I would explain that the symptoms of gum disease, also known as periodontal disease, can vary depending on the stage of the disease. Common symptoms include:Red or swollen gums .Bleeding gums.Tender gums.Receding gums.Persistent bad breath or bad taste in the mouth.Loose or shifting teeth.Pain when chewing.Sensitive teeth.	2	2	N/A	2	The symptoms of gum disease (periodontal disease) can vary depending on the stage of the disease, but common signs include:Red, swollen, or tender gums.Bleeding gums.Receding gums.Persistent bad breath.Loose teeth.Pus between the teeth and gums.Pain when chewing.Sensitive teeth.Changes in the way teeth fit together .	2	2	N/A	2	As a periodontologist, I'd explain that the symptoms of gum disease, also known as periodontal disease, can vary depending on the stage of the disease. Here are some common symptoms:Red or swollen gums.Tender or bleeding gums.Bad breath.Receding gums .Sensitive teeth.Loose teeth.Pain when chewing.New spaces developing between your teeth.Pus between your teeth and gums.	2	2	N/A	2	As a periodontologist, here are the common symptoms of gum disease to watch for:Red or swollen gums.Tender or bleeding gums.Painful chewing.Loose teeth.Sensitive teeth.Receding gums or longer appearing teeth.Persistent bad breath.If you notice any of these symptoms, it’s important to see a periodontologist or dentist to get a proper evaluation and discuss potential treatment options.	2	2	N/A	2	As a periodontologist, the symptoms of gum disease I would look for include:Red, swollen, or tender gums.Bleeding while brushing or flossing.Receding gums (gums pulling away from the teeth).Persistent bad breath.Loose or shifting teeth.Formation of deep pockets between teeth and gums.Changes in the way your teeth fit together when you bite.If you experience any of these symptoms, it’s important t…	2	2	N/A	2	As a periodontologist, I'd inform you that the symptoms of gum disease (periodontal disease) can vary depending on the stage of the disease, but common symptoms include:Red, swollen, or tender gums.Bleeding gums.Receding gums.Persistent bad breath.Loose teeth.New spaces developing between your teeth.Pus between your teeth and gums.Pain when chewing.	2	2
[truncated: 102 more columns]
