# Supplementary material for: Efficacy Of Chatgpt-4 in Oral Hygiene Counseling: Evaluation of Information Accuracy and Repeatability
Source: Research Square preprint supplement (doi:10.21203/rs.3.rs-6776535/v1), 2025-06-08
Supplement: Supplementary file 3 [file f30733b4484405b47f88ad2e.docx]

| 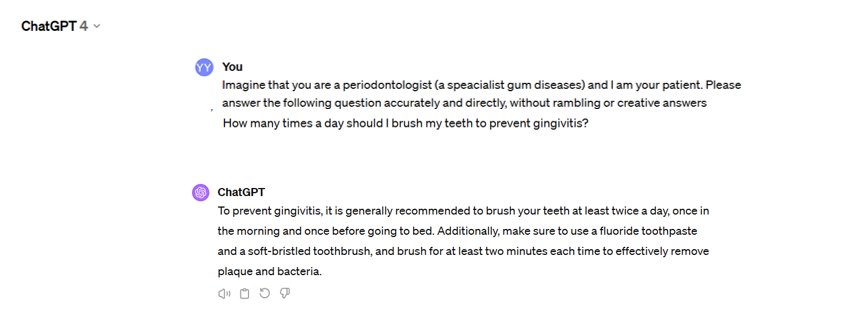 |
| --- |
| 1. A screenshot of the question-and-answer application in ChatGPT-4. |
| 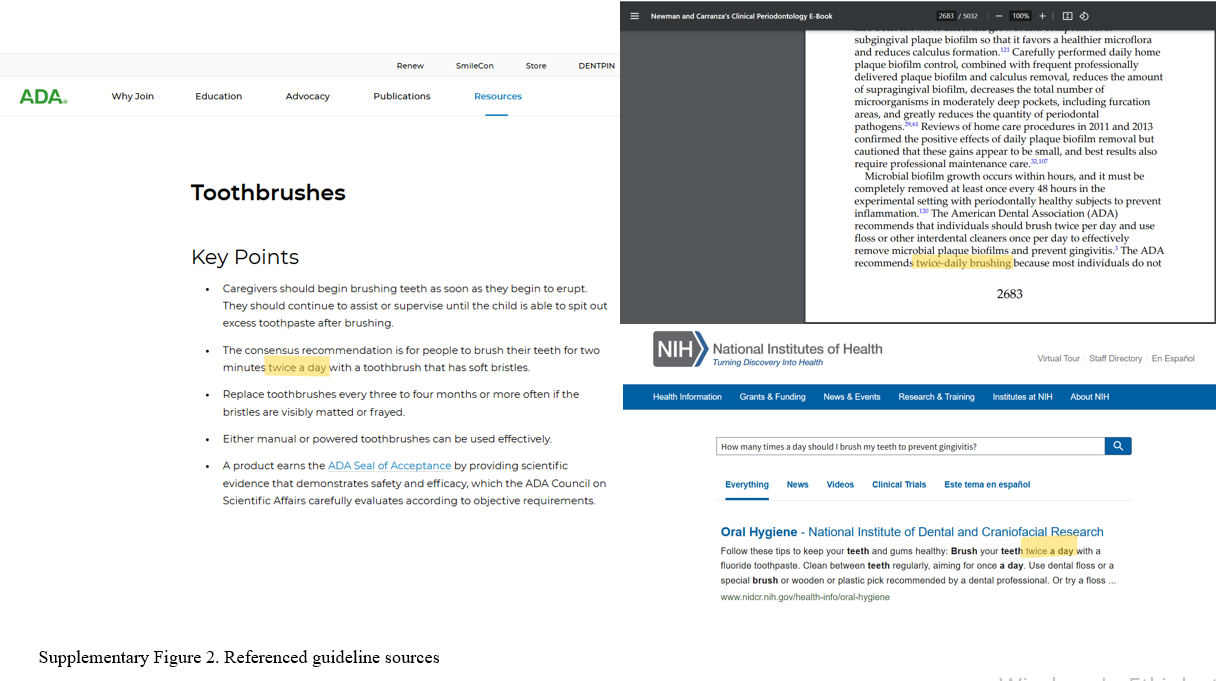 |
| 1. A screenshot of the reference guideline sources |

**Supplementary Figure 1.** Workflow demonstrating the use of questions directed to ChatGPT 4 and dental guides.

An example of the question template submitted to ChatGPT 4, the response received, and the use of guidelines referenced during question preparation and evaluation of responses is provided in Supplementary Figure 1.
